# Supplementary material for: Design, synthesis and biological evaluation of small molecule-based PET radioligands for the 5-hydroxytryptamine 7 receptor
Source: Royal Society of Chemistry journal article supplement (doi:10.1039/c4ra15833d), 2015-01-01

## Supplementary Information

### Design, synthesis, and biological evaluation of small molecule-based PET radioligands for the 5-hydroxytryptamine 7 receptor

**A.K. Tiwari,<sup>a,b</sup> J. Yui,<sup>a</sup> P. Singh,<sup>b</sup> S. Agrawal,<sup>b</sup> T. Yamasaki,<sup>a</sup> L. Xie,<sup>a</sup> N. Chadha,<sup>b</sup> Y. Zhang,<sup>a</sup> M. Fujinaga,<sup>a</sup> Y. Shimoda,<sup>a</sup> K. Kumata,<sup>a</sup> A.K. Mishra,<sup>b,\*</sup> M. Ogawa,<sup>a,c</sup> M.-R. Zhang<sup>a,\*</sup>**

<sup>a</sup>*Molecular Imaging Centre, National Institute of Radiological Sciences, Inage-ku, Chiba 263-8555, Japan*

<sup>b</sup>*Division of Cyclotron and Radiopharmaceutical Sciences, Institute of Nuclear Medicine and Allied Sciences, Brig. S. K. Mazumdar Road, Delhi-110054, India*

<sup>c</sup>*SHI Accelerator Service Co. Ltd, Shinagawa-ku, Tokyo 141-8686, Japan*

Content:

Supplemental Figure 1. CADD analysis

Supplemental Figure 2. HPLC separation chart for 1

Supplemental Figure 3. Radio analytical HPLC chart for [<sup>11</sup>C]1

## Supplementary Information

### Supplemental Figure 1.

CADD analysis

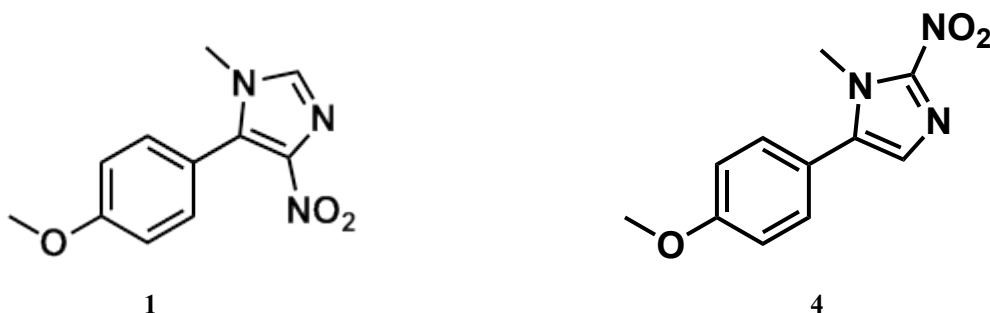

All possible substitution has been studied for 1,2, 1,3 and 1,4 substituted azoles below the molecular weight 300. Fifteen molecule having good XP Gscore values (more than -10) were selected and evaluated for binding free energy estimates using MM-GBSA. Among them two structurally diverse hits were selected on the basis of binding free energy estimates, XP Gscore and visual inspection of binding pattern. The docked complex of these final two with 5-HT<sub>7</sub> receptor was subjected to MD simulations for 5ns in NPT ensemble. The RMSD values for the  $\alpha$ C atoms in 5-HT<sub>7</sub> receptor has attained the equilibrium after the 2ns simulations around the value of 3.2Å. The RMSF values of  $\alpha$ C atoms was found to be highly fluctuating in the region of residues 200-250 including important residues such as Phe289 and Phe290 which is found to be involved in  $\pi$ - $\pi$  stacking throughout the simulation in terms of largest hydrophobic interactions contribution in the stability of ligand at binding pocket of 5-HT<sub>7</sub> receptor.

One of the important interactions which is known to be conserved in all the 5-HT<sub>7</sub> binding ligands is hydrogen bonding with Ser203 which is present throughout the simulation with the largest contribution in the form of hydrogen bonding interactions. In similar terms other all the interactions in static flexible docking were found to be present during the 5ns simulations with very few water bridges. The vicinity of hydrophobic residues; Val114, Cys117, and Leu312 along with charged interaction with Asp113 was present with significant contribution throughout the simulations.

## Supplementary Information

### Supplementary Figure 2

#### Separation chart of 1

HPLC (Capcell Pack UG80 C<sub>18</sub> column (10.0 mm i.d. × 250 mm). MeCN/H<sub>2</sub>O/ Et<sub>3</sub>N, 6.0/4.0/0.01 (v/v/v), flow rate = 4.0 mL/min,  $\lambda_{uv}$  = 254 nm)

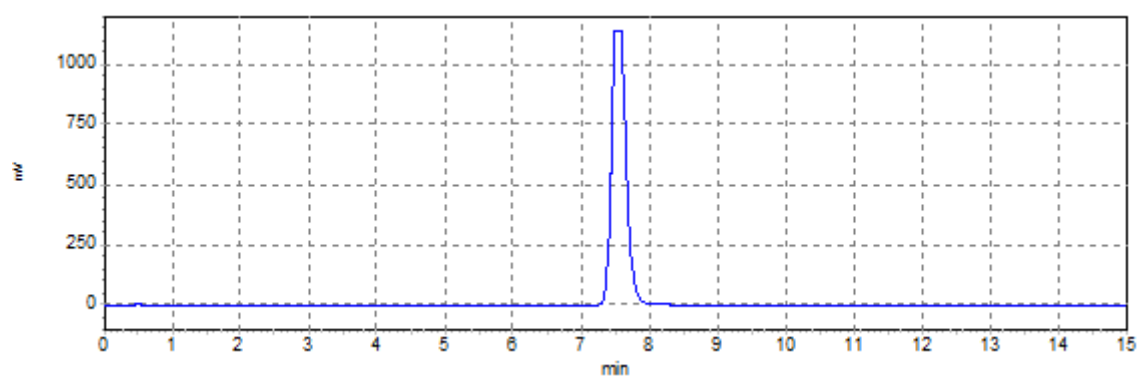

## Supplementary Information

### Supplemetry Figure 3

Radio analytical HPLC chart of [ $^{14}\text{C}$ ]1

HPLC (Capcell Pack UG80  $\text{C}_{18}$  column (4.6 mm i.d.  $\times$  250 mm). MeCN/ $\text{H}_2\text{O}$ /  $\text{Et}_3\text{N}$ , 4.0/6.0/0.01 (v/v/v), flow rate = 1.0 mL/min,  $\lambda_{\text{uv}}$  = 254 nm)

(Red denotes RI detector measurements and blue for UV detector)

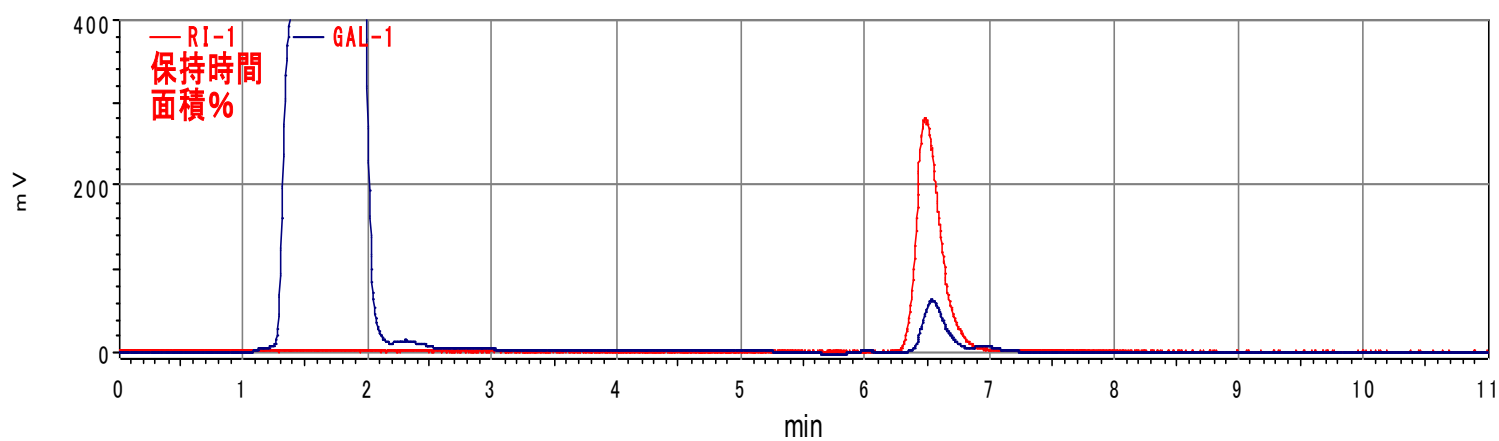

Supplement: c4ra15833d1.pdf [file c4ra15833d1.pdf]
